# Supplementary material for: Mycobacterium tuberculosis–derived circulating cell-free DNA in patients with pulmonary tuberculosis and persons with latent tuberculosis infection
Source: PubMed Central journal article supplement (PMC8224927; doi:10.1371/journal.pone.0253879), 2021-06-24
Supplement: pone.0253879.s001.pdf [file pone.0253879.s001.pdf]

Original article

Title: ***Mycobacterium tuberculosis*–derived circulating cell–free DNA in patients with pulmonary tuberculosis and persons with latent tuberculosis infection**

Authors: **Sheng-Wei Pan<sup>a,b,c</sup>, Wei-Juin Su<sup>a,b</sup>, Yu-Jiun Chan<sup>c,d,e</sup>, Fan-Yi Chuang<sup>a,b</sup>, Jia-Yih Feng<sup>a,b</sup>, and Yuh-Min Chen<sup>a,b</sup>**

Institution:

<sup>a</sup>Department of Chest Medicine, Taipei Veterans General Hospital, Taipei, Taiwan

<sup>b</sup>School of Medicine, National Yang Ming Chiao Tung University, Taipei, Taiwan

<sup>c</sup>Institute of Public Health, National Yang Ming Chiao Tung University, Taipei, Taiwan

<sup>d</sup>Division of Infectious Diseases, Department of Medicine, Taipei Veterans General Hospital, Taipei, Taiwan

<sup>e</sup>Division of Microbiology, Department of Pathology and Laboratory Medicine, Taipei Veterans General Hospital, Taipei, Taiwan

**Keywords:** cell-free DNA; digital PCR; latent tuberculosis infection; pulmonary tuberculosis

**Running Title: MTB-cfDNA in patients with TB and persons with LTBI**

**The corresponding authors:**

Jia-Yih Feng, MD., PhD.

Department of Chest Medicine, Taipei Veterans General Hospital

No. 201, Sec. 2, Shih-Pai Rd., Taipei, Taiwan. E-mail: peterofeng@gmail.com

and

Sheng-Wei Pan, MD., PhD.

Department of Chest Medicine, Taipei Veterans General Hospital

No. 201, Sec. 2, Shih-Pai Rd., Taipei, Taiwan. E-mail: sanweipan@gmail.com

## S1 File

### Appendix 1. Results of *IS6110*-targeted quantitative polymerase chain reaction in plasma cell-free DNA from patients with pulmonary tuberculosis stratified by sputum smear grading.

Among 24 patients with pulmonary tuberculosis (PTB) in the present study, 11 were sputum-smear positive for acid-fast bacilli (4 with 4+ on the grading scale, 5 with 3+, 2 with 2+, and none with 1+). Table S1 presents the results of quantitative polymerase chain reaction (qPCR) targeting the *Mycobacterium tuberculosis* (MTB)-specific *IS6110* gene fragment in plasma cell-free DNA (cfDNA) in PTB patients stratified by sputum smear grading. The median cycle threshold (Ct) value was 37.24 in patients with 4+ smear-positivity, 37.92 in those with 2-3+, and 38.58 in those with smear-negativity. However, no significant difference in the Ct values was observed between the three groups ( $p = 0.958$  in the analysis of variance). Additional large-scale studies to assess the relationship between the quantification of bacilli in sputum in patients with PTB and qPCR results are warranted.

**Table S1.** Results of qPCR targeting MTB-derived *IS6110* in the plasma cfDNA of patients with PTB stratified by sputum smear grading ( $n = 24$ ).

| Sputum smear grading              | Cycle threshold value, Median (interquartile range) |
|-----------------------------------|-----------------------------------------------------|
| Smear-positive, 4+ in grade (n=4) | 37.24 (36.32-42.93)                                 |
| Smear-positive, 2-3+ grade (n=7)  | 37.92 (33.57-45.00)                                 |
| Smear-negative (n=13)             | 38.58 (33.98-45.00)                                 |
